# Supplementary material for: Hollow titanosilicate nanospheres encapsulating PdAu alloy nanoparticles as reusable high-performance catalysts for a H2O2-mediated one-pot oxidation reaction
Source: Royal Society of Chemistry journal article supplement (doi:10.1039/c9ta01481k), 2019-01-01
Supplement: c9ta01481k1.pdf [file c9ta01481k1.pdf]

**Electronic Supplementary Information (ESI)**

**Hollow titanosilicate nanospheres encapsulating PdAu alloy  
nanoparticles as reusable high-performance catalysts for  
H<sub>2</sub>O<sub>2</sub>-mediated one-pot oxidation reaction**

**Yasutaka Kuwahara,<sup>a,b</sup> Ryo Matsumura,<sup>a</sup> Hiromi Yamashita<sup>\*,a,b</sup>**

<sup>a</sup> Division of Materials and Manufacturing Science, Graduate School of Engineering, Osaka University, 2-1 Yamada-oka, Suita, Osaka 565-0871, Japan.

<sup>b</sup> Unit of Elements Strategy Initiative for Catalysts & Batteries (ESICB), Kyoto University, Katsura, Kyoto 615-8520, Japan.

\*Fax & Tel: (+81) 6-6879-7457, E-mail: [yamashita@mat.eng.osaka-u.ac.jp](mailto:yamashita@mat.eng.osaka-u.ac.jp)

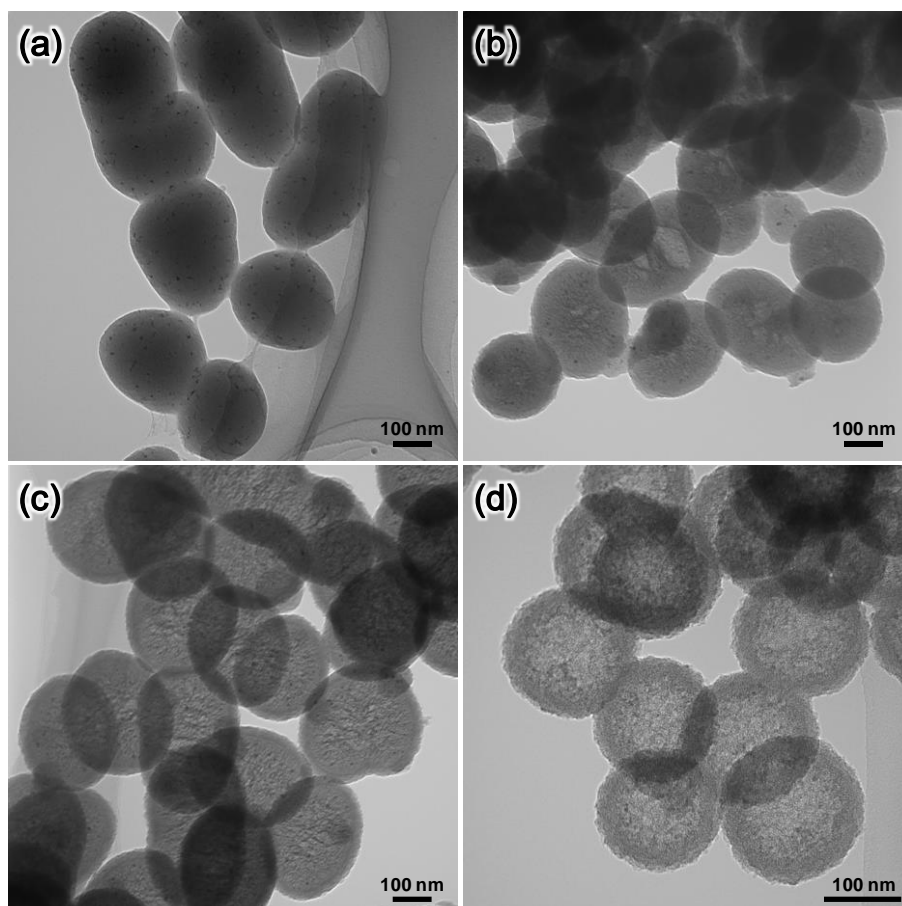

**Figure S1.** TEM images of the solids collected after (a) 0 h, (b) 10 min, (c) 30 min and (d) 2 h of BTME (1,2-bis(trimethoxysilyl)ethane) addition during the synthesis of Pd@Ti-HMSS.

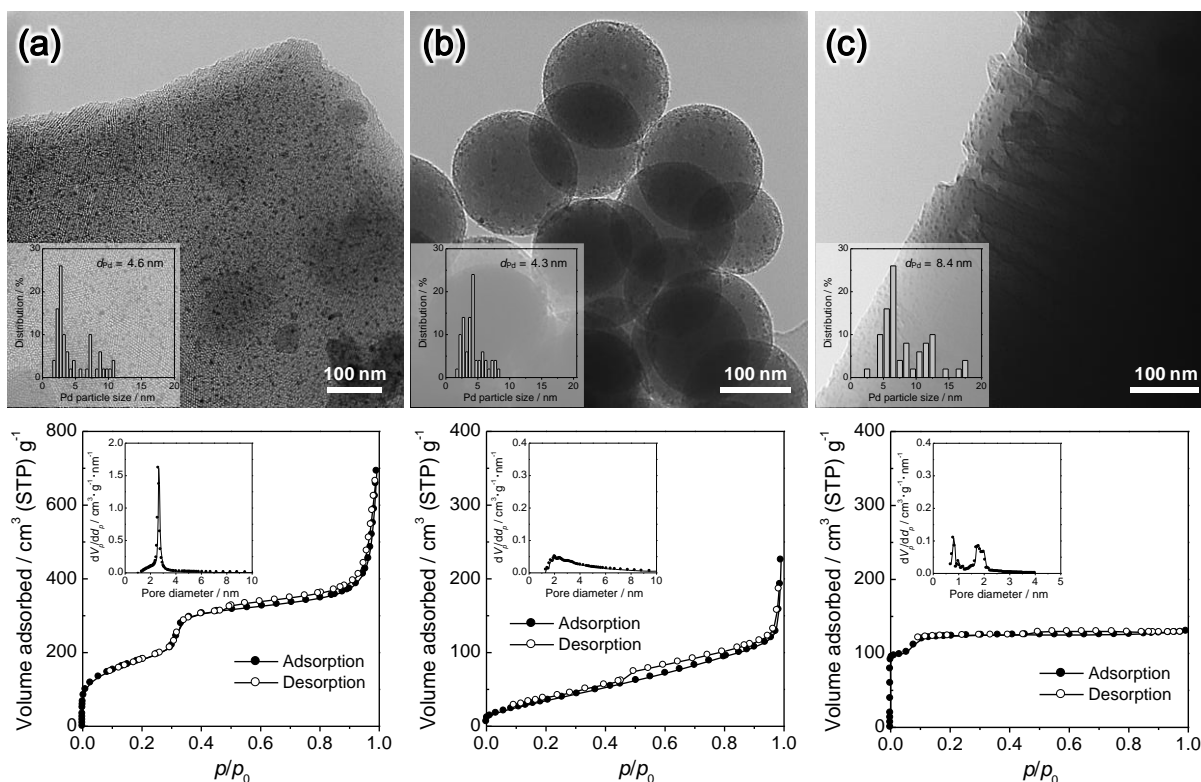

**Figure S2.** (Above) TEM images (insets show distribution diagrams for Pd NPs) and (Below)  $N_2$  adsorption-desorption isotherms (insets show pore distribution curves) for (a) Pd/Ti-MCM-41, (b) Pd/Ti-SiO<sub>2</sub> sphere and (c) Pd/TS-1 catalysts. Pore distribution curves for Pd/Ti-MCM-41 and Pd/Ti-SiO<sub>2</sub> sphere were determined by BJH (Barrett–Joyner–Halenda) method, and that for Pd/TS-1 was determined by SF (Saito–Foley) method.

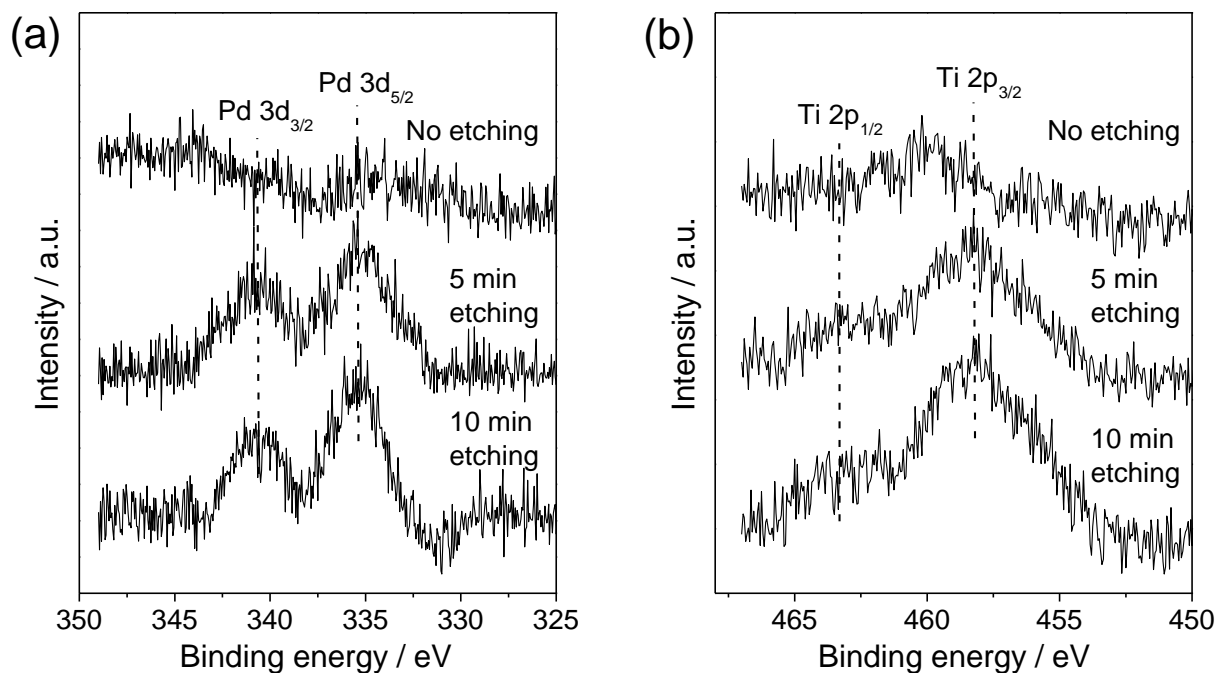

**Figure S3.** (a) Pd 3d XPS spectra and (b) Ti 2p XPS spectra for Pd@Ti-HMSS catalyst without Ar etching and after Ar etching for 5 min and 10 min.

The peaks seen at around 341 and 335 eV in Figure S3(a) are assignable to Pd 3d<sub>3/2</sub> and Pd 3d<sub>5/2</sub> core levels of Pd<sup>0</sup> species, respectively. These peaks emerged after Ar etching treatment, while they could not be observed without Ar etching, indicating that Pd species are present inside the hollow silica spheres. Similarly, the peaks seen at around 463 and 458 eV in Figure S3(b) are assignable to Ti 2p<sub>1/2</sub> and Ti 2p<sub>3/2</sub> core levels of Ti<sup>4+</sup> oxide species, respectively. The intensity of these peaks increased after Ar etching treatment, indicating that Ti species are mostly present in the silica matrices of the shell.

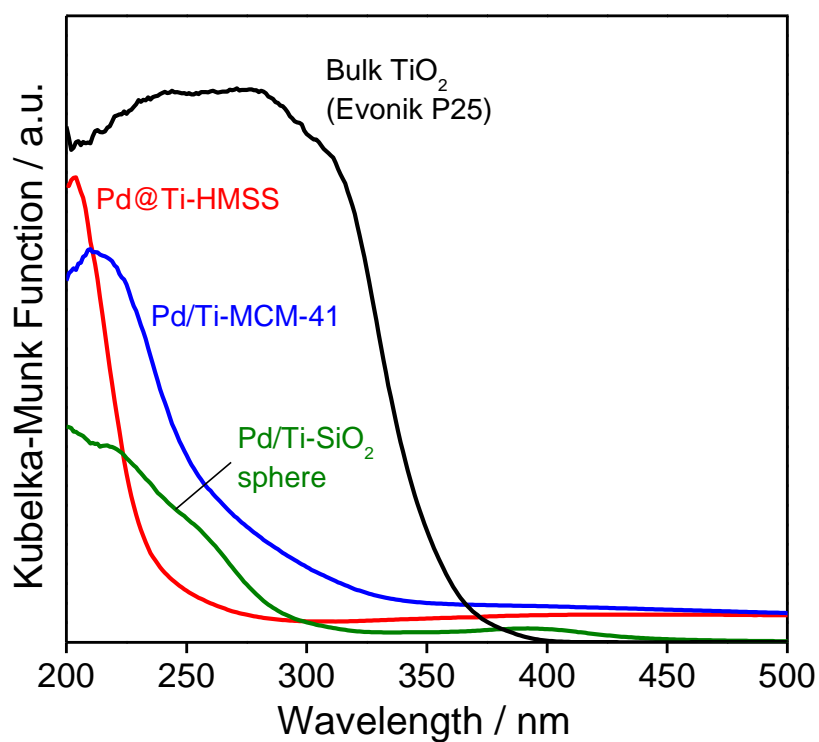

**Figure S4.** Diffuse reflectance UV-vis spectra of Pd@Ti-HMSS, Pd/Ti-MCM-41, Pd/Ti-SiO<sub>2</sub> sphere and bulk TiO<sub>2</sub> powder (Evonik P25).

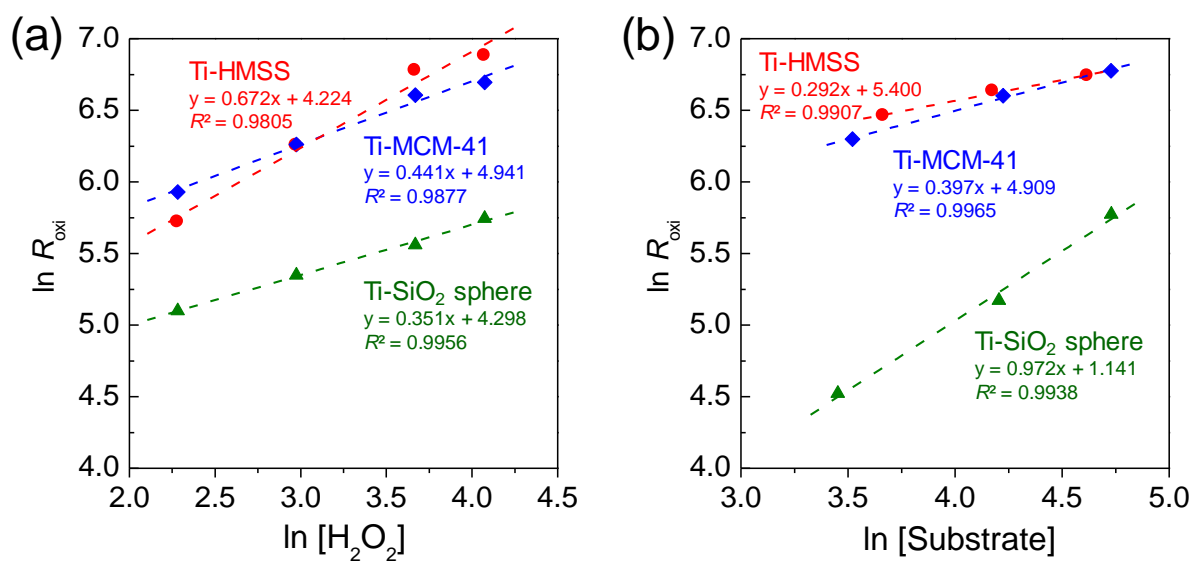

**Figure S5.** (a) Double logarithm plots of the  $\text{H}_2\text{O}_2$  concentration ( $[\text{H}_2\text{O}_2]$ ) and the initial reaction rates in the oxidation of methyl phenyl sulfide ( $R_{\text{oxi}}$ ). *Reaction conditions:* catalyst (50 mg), methyl phenyl sulfide (0.3 mmol),  $\text{H}_2\text{O}_2$  (0.1-0.6 mmol), acetonitrile (10 mL), 30 °C,  $t = 15$  min. (B) Double logarithm plots of the substrate concentration ( $[\text{Substrate}]$ ) and the initial reaction rates in the oxidation of methyl phenyl sulfide ( $R_{\text{oxi}}$ ) over Ti-HMSS, Ti-MCM-41 and Ti-SiO<sub>2</sub> sphere catalysts. *Reaction conditions:* catalyst (50 mg), methyl phenyl sulfide (0.3-1.0 mmol),  $\text{H}_2\text{O}_2$  (0.2 mmol), acetonitrile (10 mL), 30 °C,  $t = 15$  min.

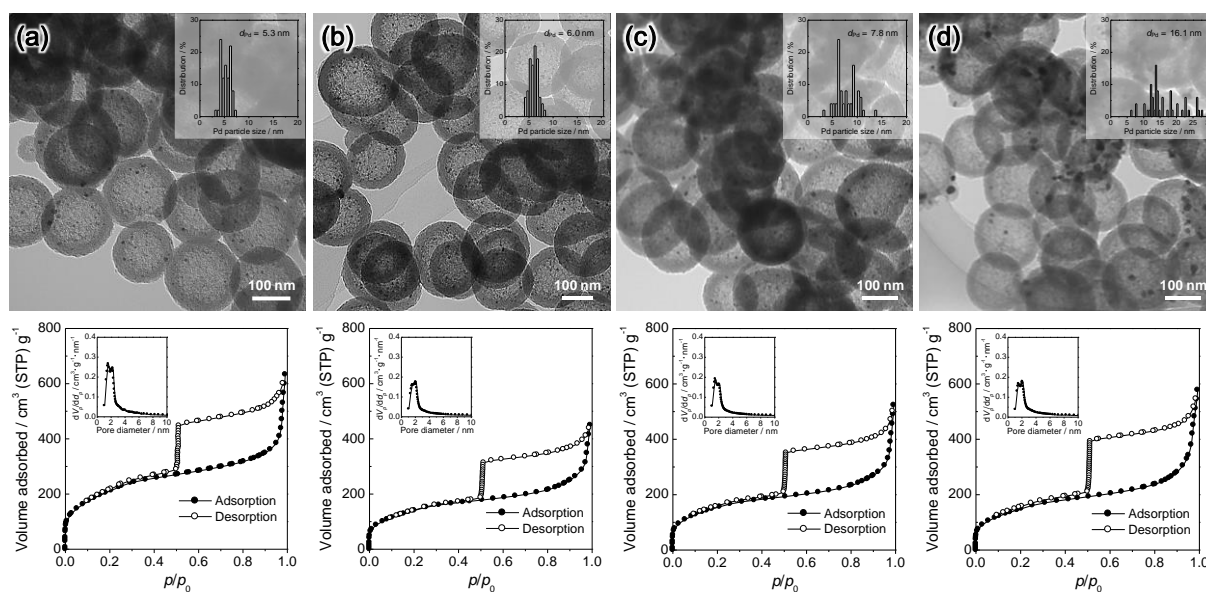

**Figure S6.** (Above) TEM images (insets show distribution diagrams for PdAu NPs) and (Below)  $N_2$  adsorption-desorption isotherms (insets show pore distribution curves determined by BJH method) for PdAu@Ti-HMSS catalysts synthesized with varied Pd/Au ratios (Pd : Au = (a) 1 : 0.3, (b) 1 : 0.5, (c) 1 : 1, (d) 1 : 3).

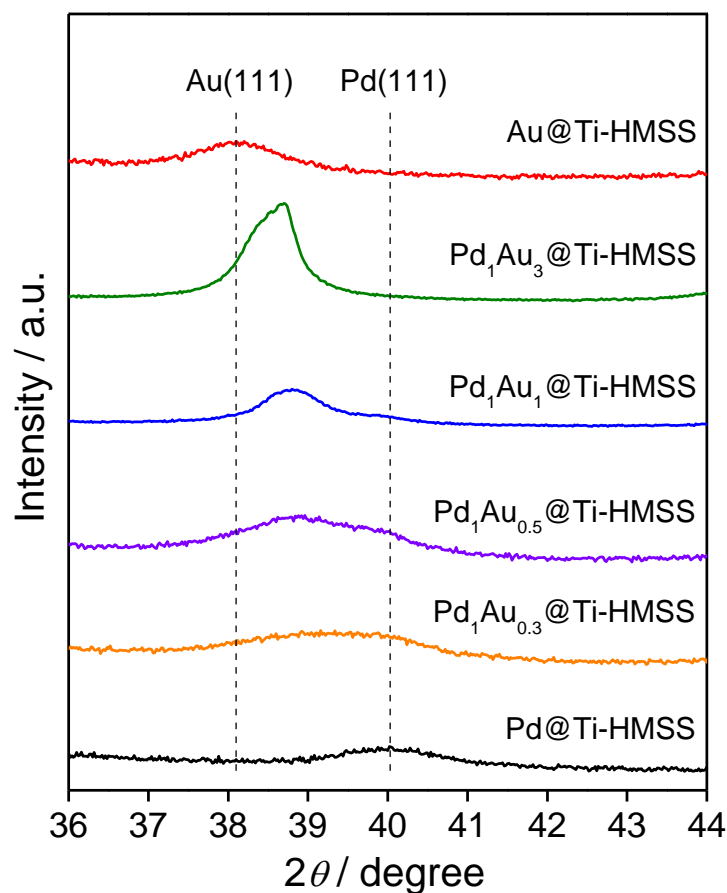

**Figure S7.** XRD patterns of PdAu@Ti-HMSS catalysts synthesized with varied Pd/Au ratios. The peaks seen at around  $2\theta = 38.1^\circ$  and  $40^\circ$  are assigned to (111) plane of Au metal and Pd metal, respectively.

The gradual shift of the peak is due to the increased lattice constant which is caused by the incorporation of Au with larger atomic radius than that of Pd, evidencing the formation of randomly-mixed PdAu alloy NPs. The gradual increase of peak intensity is simply due to the increased content of Pd+Au in the samples (Pd content was fixed in all samples, and Au content was varied in this study. For Pd and Au contents of the samples, see Table 2 in the main text).



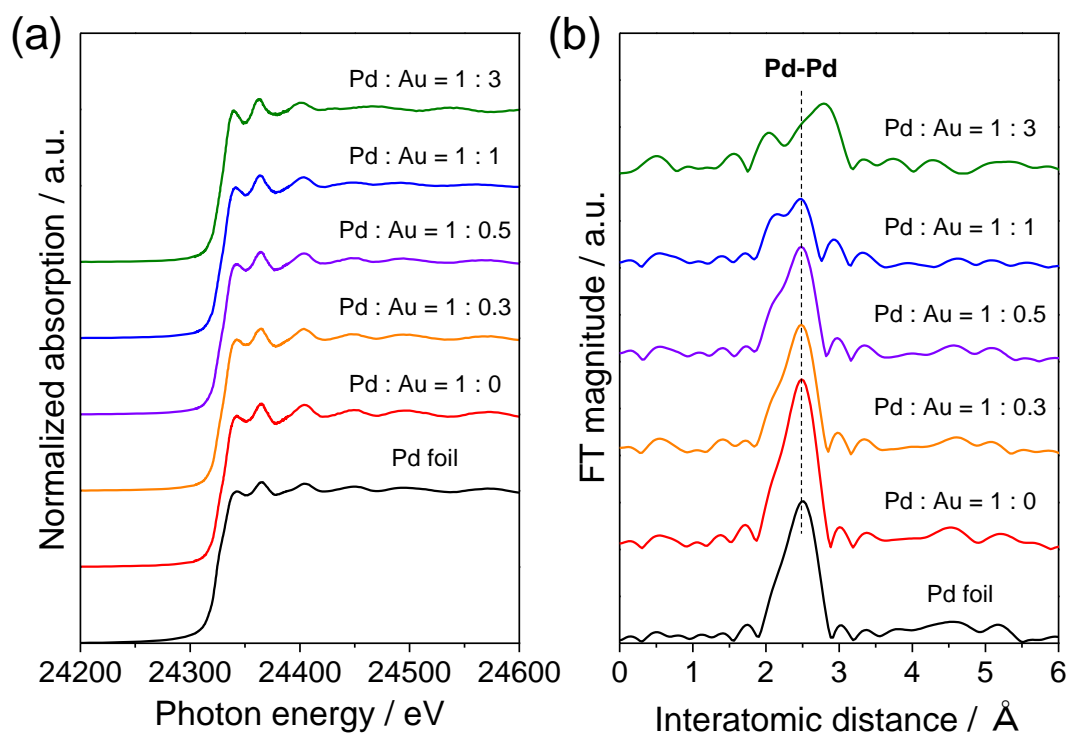

**Figure S8.** (a) Pd K-edge XANES spectra and (b) RDFs obtained from Pd K-edge EXAFS oscillations for the series of PdAu@Ti-HMSS samples with different Pd/Au ratios and Pd foil as a reference.
